# Supplementary material for: Gains and losses of metabolic function inferred from a phylotranscriptomic analysis of algae
Source: PubMed Central journal article supplement (PMC6642084; doi:10.1038/s41598-019-46869-3), 2019-07-19
Supplement: 41598_2019_46869_MOESM1_ESM.pdf [file 41598_2019_46869_MOESM1_ESM.pdf]

## Supplementary Information

# Gains and losses of metabolic function inferred from a phylotranscriptomic analysis of algae

Falicia Qi Yun Goh<sup>a,b</sup>, Justin Jeyakani<sup>b</sup>, Phornpimon Tiphara<sup>b</sup>, Amaury Cazenave-Gassiot<sup>c</sup>,  
Rajoshi Ghosh<sup>b</sup>, Nicholas Bogard<sup>b</sup>, Zhenxuan Yeo<sup>a,b</sup>, Gane Ka-Shu Wong<sup>e,f,g</sup>, Michael Melkonian<sup>h</sup>,  
Markus R. Wenk<sup>c</sup>, and Neil D. Clarke<sup>a,b,d,\*</sup>

<sup>a</sup> Yale-NUS College

Singapore 138527, Singapore

<sup>b</sup> Computational and Systems Biology

Genome Institute of Singapore

Singapore 138672

<sup>c</sup> Department of Biochemistry

Yong Loo Lin School of Medicine

National University of Singapore

Singapore 117596

<sup>d</sup> Department of Biological Sciences

National University of Singapore

Singapore 117543

<sup>e</sup> Department of Biological Sciences

University of Alberta

Edmonton, AB, T6G 2E9, Canada

<sup>f</sup> Department of Medicine

University of Alberta

Edmonton, AB, T6G 2E1, Canada

<sup>g</sup> BGI-Shenzhen

Beishan Industrial Zone, Yantian District

Shenzhen 518083, China

<sup>h</sup> Botanical Institute, Cologne Biocenter,

University of Cologne

50674 Cologne, Germany

Corresponding author:

Neil D. Clarke

Yale-NUS College

6 College Avenue West

Singapore 138527

+65 8123 1497

[neil.clarke@yale-nus.edu.sg](mailto:neil.clarke@yale-nus.edu.sg)

# Supplementary Figure S1

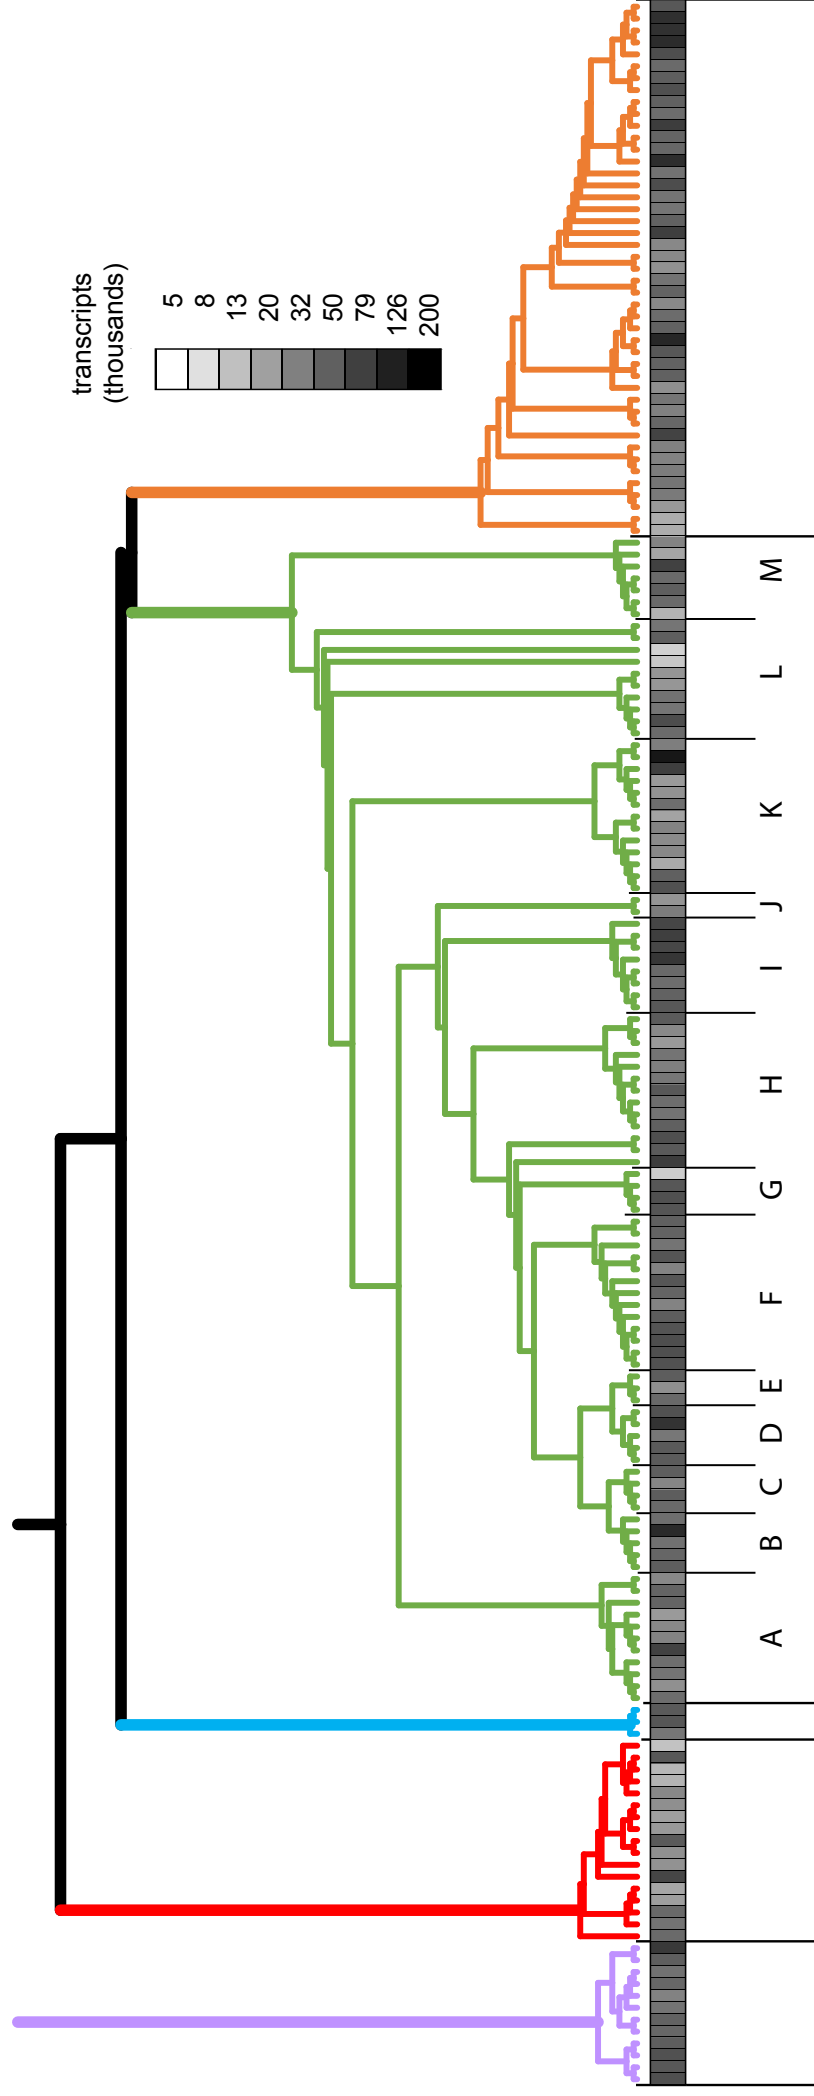

**Supp Figure 1:** Phylogenetic tree with transcript numbers and chlorophyte cluster labels. The number of transcript scaffolds assembled for each of the samples in the tree is indicated in the heatmap. Long vertical lines below the heatmap demarcate the five major clades. Shorter lines demarcate the 13 clusters of Chlorophyta defined as described in Methods. Clusters are labeled A-M.

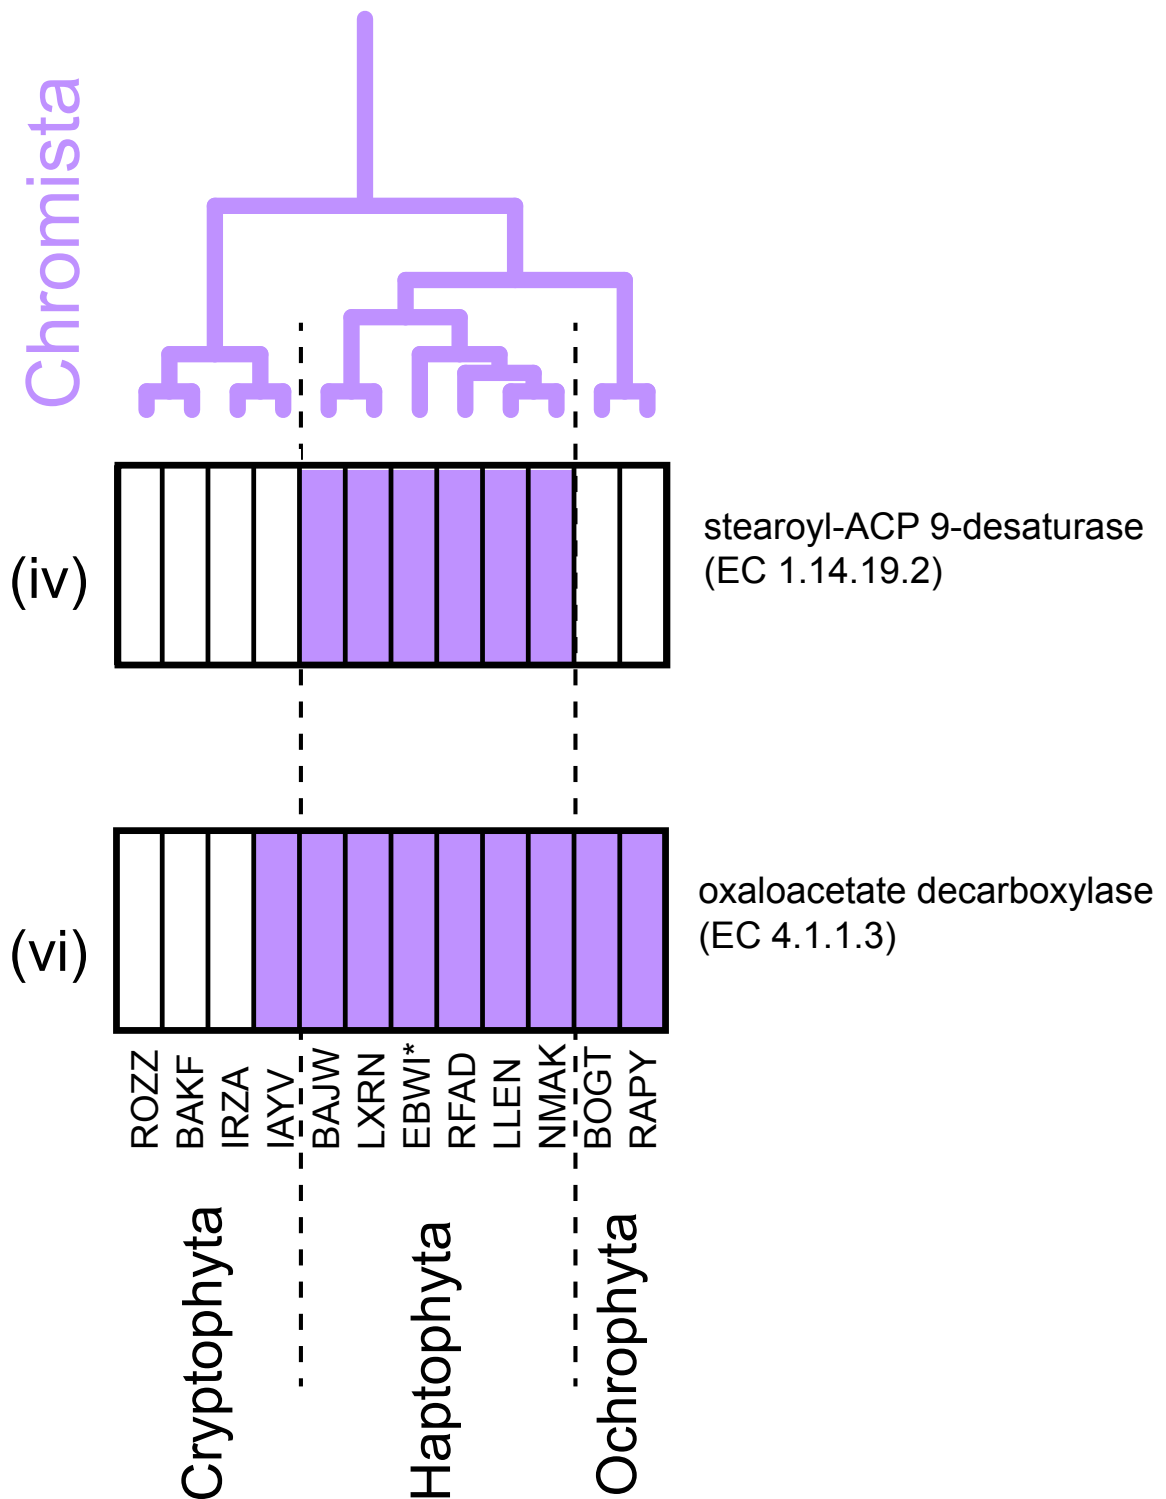

**Supp Figure S2:** This is essentially a close-up of the Chromista region from Fig 1A in the paper, and Fig 1B, HMMs iv and vi. This closeup provides the OneKP codes for the 12 chromista samples. Dashed lines help distinguish the three main clades as defined by the tree. These clades correspond very closely to the traditional taxonomic classification, given by the labels at the bottom. (There is only one sample - EBWI, indicated by an asterisk - whose placement is suspect). Note that all six samples that have hits to EC 1.14.19.2 (a fatty acid desaturase) are in the clade labeled as Haptophyta; conversely all of the samples in the clade have the sequence. Oxaloacetate decarboxylase is absent in only three of the twelve Chromista, but all three of the samples in which it is missing are cryptophytes.

A

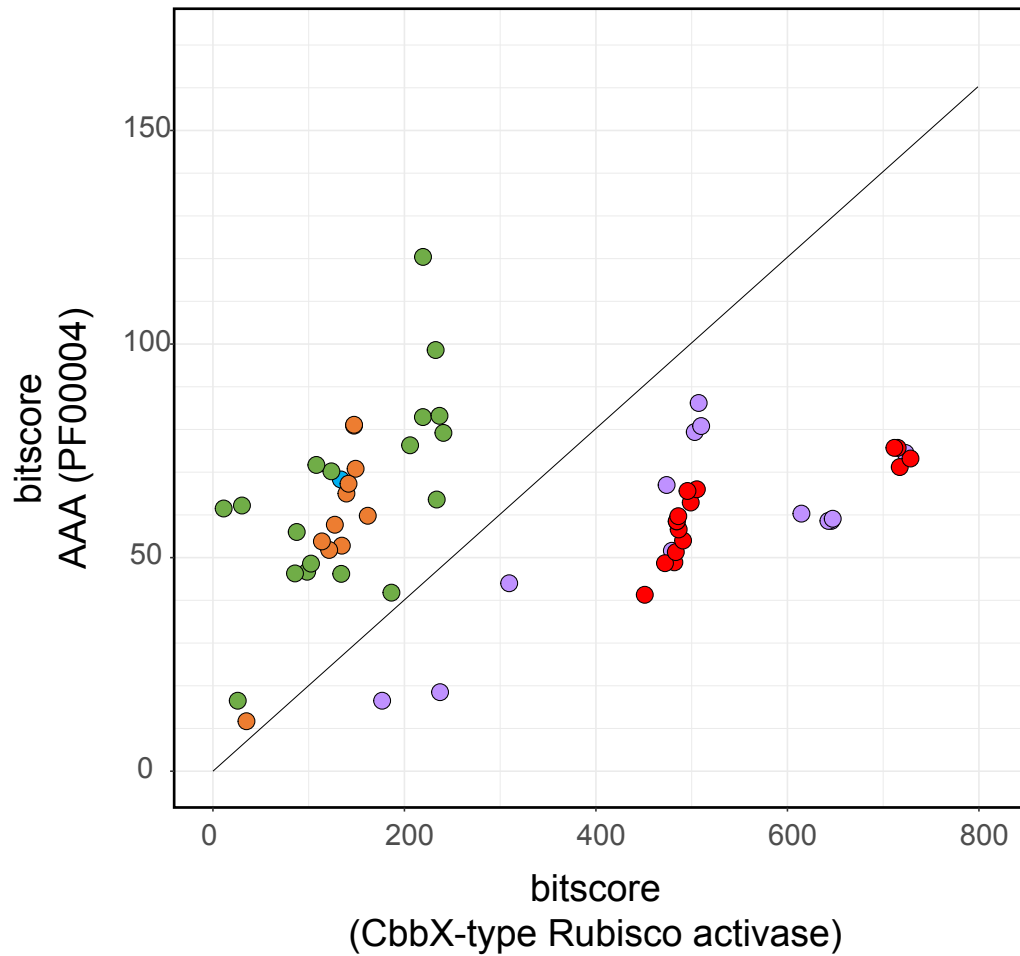

B

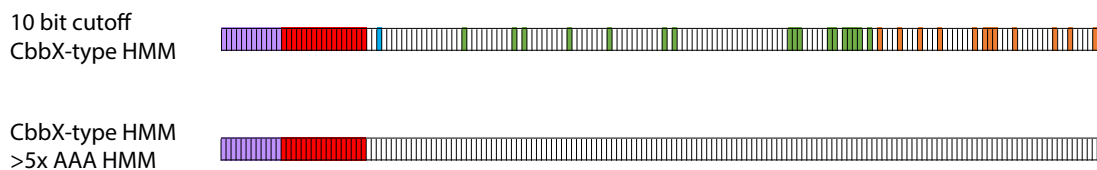

**Supp Figure S3:** Alternative criteria for defining the presence of CbbX-type Rubisco activase sequences. (A) Plot of all samples for which a hit was found to an HMM for CbbX-type Rubisco activase at a threshold of 10 bits. The y-axis value is the bit-score for the same scaffold run against the Pfam HMM PF00004 (AAA). Samples are color coded in the same way as figures in the manuscript: purple are Chromista; red are rhodophytes; green are chlorophytes; and orange are streptophyte algae. The diagonal line has an intercept of 0 and a slope of 0.2; points to the right of this line have bitscores for CbbX-type Rubisco activase that are at least 5x higher than for the AAA HMM. (B) Representation of CbbX-type positive samples based on only the 10 bit threshold criterion (top) and for the criterion used in the paper, which is the same 10 bit threshold, plus a bitscore for CbbX-type HMM at least 5-fold higher than for the AAA HMM.

Supplementary Table S1

| Data in columns A-I were downloaded from <a href="http://www.onekp.com/samples/list.php">http://www.onekp.com/samples/list.php</a> . |                     |                  |                    |                                         |                     |                                                      |                 | additional annotations     |                                    |                        |                                           |                                              |               |  |
|--------------------------------------------------------------------------------------------------------------------------------------|---------------------|------------------|--------------------|-----------------------------------------|---------------------|------------------------------------------------------|-----------------|----------------------------|------------------------------------|------------------------|-------------------------------------------|----------------------------------------------|---------------|--|
| 1Kp Sample<br>[sample codes]                                                                                                         | Clade               | Order            | Family             | Species                                 | Tissue Type         | Voucher Data<br>[culture collection strain<br>names] | Sample Provider | Notes [appended to bottom] | order (left to right) in tree figs | #scaffolds in assembly | Chlorophyte class (based on<br>Algaebase) | Chlorophyte cluster (see Methods, fig<br>S1) | prasinophytes |  |
| ROZZ                                                                                                                                 | Chromista (Algae)   | Pyrenomonadales  | Chroomonadaceae    | Chroomonas sp.                          | algal cells         | M1312                                                | M. Melkonian    |                            | 1                                  | 62685                  |                                           |                                              |               |  |
| BAKF                                                                                                                                 | Chromista (Algae)   | Cryptomonadales  | Cryptomonadaceae   | Cryptomonas curvata                     | algal cells         | CCAC 0006 (M0420)                                    | M. Melkonian    |                            | 2                                  | 56233                  |                                           |                                              |               |  |
| IRZA                                                                                                                                 | Chromista (Algae)   | Pyrenomonadales  | Geminigeraceae     | Proteomonas sulcata                     | algal cells         | CCMP 704                                             | M. Melkonian    |                            | 3                                  | 62109                  |                                           |                                              |               |  |
| IAYV                                                                                                                                 | Chromista (Algae)   | Pyrenomonadales  | Pyrenomonadaceae   | Rhodomonas sp.                          | algal cells         | M1630                                                | M. Melkonian    |                            | 4                                  | 51627                  |                                           |                                              |               |  |
| BAIW                                                                                                                                 | Chromista (Algae)   | Isochrysidales   | Isochrysidaceae    | Isochrysis sp.                          | algal cells         | CCAP 927/14                                          | M. Melkonian    |                            | 5                                  | 45228                  |                                           |                                              |               |  |
| LXRN                                                                                                                                 | Chromista (Algae)   | Prymnesiales     | Prymnesiaceae      | Prymnesium parvum                       | algal cells         | SAG 127.79                                           | M. Melkonian    |                            | 6                                  | 48769                  |                                           |                                              |               |  |
| EBWI                                                                                                                                 | Chromista (Algae)   | Chromulinales    | Chromulinaceae     | Ochromonas sp.                          | algal cells         | M1920                                                | M. Melkonian    |                            | 7                                  | 37616                  |                                           |                                              |               |  |
| RFAD                                                                                                                                 | Chromista (Algae)   | Pavloviales      | Pavloviaceae       | Pavlova lutheri CCAC 0028               | algal cells         | CCAC 0028 (M1025)                                    | M. Melkonian    |                            | 8                                  | 30689                  |                                           |                                              |               |  |
| LLEN                                                                                                                                 | Chromista (Algae)   | Pavloviales      | Pavloviaceae       | Pavlova lutheri SAG 926-1               | algal cells         | SAG 926-1                                            | M. Melkonian    |                            | 9                                  | 45335                  |                                           |                                              |               |  |
| NMAK                                                                                                                                 | Chromista (Algae)   | Pavloviales      | Pavloviaceae       | Pavlova lutheri                         | cells grown on F/2  | UTEX LB 1293                                         | N. Clarke       |                            | 10                                 | 38916                  |                                           |                                              |               |  |
| BOGT                                                                                                                                 | Chromista (Algae)   | Synurales        | Mallomonadaceae    | Mallomonas sp.                          | algal cells         | CCAC 0094                                            | M. Melkonian    |                            | 11                                 | 51201                  |                                           |                                              |               |  |
| RAPY                                                                                                                                 | Chromista (Algae)   | Laminariales     | Laminariaceae      | Saccharina sculpera                     | blades              | Tao Liu 201107019                                    | Jun Yu          |                            | 12                                 | 88085                  |                                           |                                              |               |  |
| LLXI                                                                                                                                 | Red Algae           | Stylonematales   | Stylonemataceae    | Chroodactylon ornatum                   | algal cells         | CCAP 1364/1                                          | M. Melkonian    |                            | 13                                 | 43085                  |                                           |                                              |               |  |
| JJZR                                                                                                                                 | Red Algae           | Rhodochaetales   | Rhodochaetaeaceae  | Rhodochaete parvula                     | algal cells         | SAG 8.99                                             | M. Melkonian    |                            | 14                                 | 37895                  |                                           |                                              |               |  |
| RSOF                                                                                                                                 | Red Algae           | Glaucosphaerales | Glaucosphaeraceae  | Glaucosphaera vacuolata                 | algal cells         | SAG 13.82                                            | M. Melkonian    |                            | 15                                 | 43879                  |                                           |                                              |               |  |
| PVGP                                                                                                                                 | Red Algae           | Porphyridiales   | Porphyridiaceae    | Porphyridium purpureum                  | algal cells         | SAG 1380-1c                                          | M. Melkonian    |                            | 16                                 | 20562                  |                                           |                                              |               |  |
| OBUY                                                                                                                                 | Red Algae           | Porphyridiales   | Porphyridiaceae    | Porphyridium cruentum                   | cells grown on F/2  | UTEX 161                                             | N. Clarke       |                            | 17                                 | 18242                  |                                           |                                              |               |  |
| ZULJ                                                                                                                                 | Red Algae           | Bangiales        | Bangiaceae         | Pyropia yezoensis                       | blades              | Tao Liu 201104053                                    | Jun Yu          |                            | 18                                 | 72975                  |                                           |                                              |               |  |
| XAXW                                                                                                                                 | Red Algae           | Ceramiales       | Rhodomelaceae      | Neosiphonia japonica                    | branches and blades | Tao Liu 201104042                                    | Jun Yu          |                            | 19                                 | 24378                  |                                           |                                              |               |  |
| JEBK                                                                                                                                 | Red Algae           | Gigartinales     | Solieriaceae       | Eucluma denticulatum                    | branches            | Tao Liu 201010021                                    | Jun Yu          |                            | 20                                 | 25026                  |                                           |                                              |               |  |
| IHYU                                                                                                                                 | Red Algae           | Gigartinales     | Solieriaceae       | Kappaphycus alvarezii                   | branches            | Tao Liu 201103110                                    | Jun Yu          |                            | 21                                 | 54853                  |                                           |                                              |               |  |
| CXFX                                                                                                                                 | Red Algae           | Gigartinales     | Phylloporaceae     | Ahnfeltiopsis flabelliformis            | branches and blades | Tao Liu 201108707                                    | Jun Yu          |                            | 22                                 | 21987                  |                                           |                                              |               |  |
| SBLT                                                                                                                                 | Red Algae           | Gigartinales     | Endocladaceae      | Gloiopeltis furcata                     | branches and blades | Tao Liu 201104135                                    | Jun Yu          |                            | 23                                 | 20185                  |                                           |                                              |               |  |
| UGPM                                                                                                                                 | Red Algae           | Gigartinales     | Gigartineae        | Chondrus crispus                        | blades              | Tao Liu 201104049                                    | Jun Yu          |                            | 24                                 | 25527                  |                                           |                                              |               |  |
| PYDB                                                                                                                                 | Red Algae           | Halymeniales     | Halymeniaceae      | Grateloupia catenata                    | branches and blades | Tao Liu 201108705                                    | Jun Yu          |                            | 25                                 | 28270                  |                                           |                                              |               |  |
| URSB                                                                                                                                 | Red Algae           | Halymeniales     | Halymeniaceae      | Grateloupia turururu                    | blades              | Tao Liu 201104125                                    | Jun Yu          |                            | 26                                 | 15114                  |                                           |                                              |               |  |
| IKIZ                                                                                                                                 | Red Algae           | Halymeniales     | Halymeniaceae      | Grateloupia livida                      | blades              | Tao Liu 201104057                                    | Jun Yu          |                            | 27                                 | 14255                  |                                           |                                              |               |  |
| ZIOJ                                                                                                                                 | Red Algae           | Halymeniales     | Halymeniaceae      | Grateloupia filicina                    | branches and blades | Tao Liu 201104047                                    | Jun Yu          |                            | 28                                 | 56235                  |                                           |                                              |               |  |
| FTRP                                                                                                                                 | Red Algae           | Gracilariales    | Gracilariaceae     | Gracilaria chouae                       | blades              | Tao Liu 201104180                                    | Jun Yu          |                            | 29                                 | 12073                  |                                           |                                              |               |  |
| QFND                                                                                                                                 | Glaucophyta (Algae) | Glaucocystales   | Glaucocystaceae    | Cyanophora paradoxa CCAC 0074 (M1106/1) | algal cells         | CCAC 0074 (M0763)                                    | M. Melkonian    |                            | 30                                 | 36658                  |                                           |                                              |               |  |
| POOW                                                                                                                                 | Glaucophyta (Algae) | Glaucocystales   | Glaucocystaceae    | Glaucocystis cf. nostochinearum         | algal cells         | CCAC 0088 (M1106/1)                                  | M. Melkonian    |                            | 31                                 | 58140                  |                                           |                                              |               |  |
| POED                                                                                                                                 | Glaucophyta (Algae) | Glaucocystales   | Glaucocystaceae    | Gloeochaete wittrockiana                | algal cells         | SAG 46.84                                            | M. Melkonian    |                            | 32                                 | 54785                  |                                           |                                              |               |  |
| CBNG                                                                                                                                 | Green Algae         | Ultrichales      | Borodiniaceae      | Planophila laetevirens                  | algal cells         | SAG 2008                                             | M. Melkonian    |                            | 33                                 | 41649                  | Ulvothyceae                               | A                                            |               |  |
| LETF                                                                                                                                 | Green Algae         | Ultrichales      | Borodiniaceae      | Planophila terrestris                   | algal cells         | SAG 32.98                                            | M. Melkonian    |                            | 34                                 | 25194                  | Ulvothyceae                               | A                                            |               |  |
| AJAU                                                                                                                                 | Green Algae         | Chaetophorales   | Chaetophoraceae    | Helicodictyon planctonicum              | algal cells         | UTEX LB 1570                                         | M. Melkonian    |                            | 35                                 | 37626                  | Chlorophyceae                             | A                                            |               |  |
| JJWJ                                                                                                                                 | Green Algae         | Ultrichales      | Ultrichaceae       | Acrosiphonia sp.                        | algal cells         | SAG 127.80                                           | M. Melkonian    |                            | 36                                 | 41151                  | Ulvothyceae                               | A                                            |               |  |
| COQP                                                                                                                                 | Green Algae         | Ulvales          | Ulveae             | Ochlochaete sp.                         | algal cells         | CCMP 2390                                            | M. Melkonian    | 1                          | 37                                 | 77098                  | Ulvothyceae                               | A                                            |               |  |
| OAEZ                                                                                                                                 | Green Algae         | Ulvales          | Ulveae             | Percusaria percurva                     | algal cells         | M1835                                                | M. Melkonian    |                            | 38                                 | 30043                  | Ulvothyceae                               | A                                            |               |  |
| NQYP                                                                                                                                 | Green Algae         | Chaetophorales   | Chaetophoraceae    | Pirula salina                           | algal cells         | SAG 1.95                                             | M. Melkonian    |                            | 39                                 | 28302                  | Chlorophyceae                             | A                                            |               |  |
| GIJY                                                                                                                                 | Green Algae         | Sphaeropleales   | Neochloridaceae    | Neochloris sp.                          | algal cells         | UTEX LB 1445                                         | M. Melkonian    |                            | 40                                 | 21703                  | Chlorophyceae                             | A                                            |               |  |
| KADG                                                                                                                                 | Green Algae         | Ultrichales      | Ultrichaceae       | Ignatius tetrasporus                    | algal cells         | UTEX 2012                                            | M. Melkonian    |                            | 41                                 | 47187                  | Ulvothyceae                               | A                                            |               |  |
| VBHL                                                                                                                                 | Green Algae         | Cladophorales    | Cladophoraceae     | Cladophora glomerata                    | algal cells         | CPCC 13                                              | M. Melkonian    |                            | 42                                 | 47161                  | Ulvothyceae                               | A                                            |               |  |
| YDCQ                                                                                                                                 | Green Algae         | Trentepohliales  | Trentepohliaceae   | Cephaleuros virescens                   | algal cells         | SAG 28.93                                            | M. Melkonian    |                            | 43                                 | 27954                  | Ulvothyceae                               | A                                            |               |  |
| ZDIZ                                                                                                                                 | Green Algae         | Volvocales       | Dunaliellaceae     | Dunaliella tertiolecta                  | algal cells         | CCMP 364                                             | H. Sederoff     |                            | 44                                 | 51322                  | Chlorophyceae                             | B                                            |               |  |
| WDWX                                                                                                                                 | Green Algae         | Volvocales       | Dunaliellaceae     | Dunaliella tertiolecta                  | algal cells         | UTEX LB 1000                                         | H. Sederoff     | 2                          | 45                                 | 45761                  | Chlorophyceae                             | B                                            |               |  |
| RHVC                                                                                                                                 | Green Algae         | Volvocales       | Dunaliellaceae     | Dunaliella salina                       | algal cells         | SAG 42.88                                            | M. Melkonian    |                            | 46                                 | 38926                  | Chlorophyceae                             | B                                            |               |  |
| UKUC                                                                                                                                 | Green Algae         | Volvocales       | Dunaliellaceae     | Dunaliella salina                       | algal cells         | UTEX LB 200                                          | H. Sederoff     |                            | 47                                 | 109228                 | Chlorophyceae                             | B                                            |               |  |
| SYJM                                                                                                                                 | Green Algae         | Volvocales       | Dunaliellaceae     | Dunaliella viridis dumsi                | algal cells         | UTEX LB 1644                                         | H. Sederoff     | 3                          | 48                                 | 41020                  | Chlorophyceae                             | B                                            |               |  |
| QRTH                                                                                                                                 | Green Algae         | Volvocales       | Chlamydomonadaceae | Chlorococcum microstigmatum             | algal cells         | SAG 11.43                                            | M. Melkonian    |                            | 4                                  | 49                     | 43057                                     | Chlorophyceae                                | C             |  |
| PRIQ                                                                                                                                 | Green Algae         | Pleurastrales    | Pleurastraceae     | Chlorococcum oleofaciens                | algal cells         | SAG 30.93                                            | M. Melkonian    |                            | 5                                  | 50289                  | Chlorophyceae                             | C                                            |               |  |
| ZLQE                                                                                                                                 | Green Algae         | Volvocales       | Haematococcaceae   | Stephanosphaera pluvialis               | algal cells         | SAG 78-1a                                            | M. Melkonian    |                            | 51                                 | 28849                  | Chlorophyceae                             | C                                            |               |  |
| GUBD                                                                                                                                 | Green Algae         | Volvocales       | Chlamydomonadaceae | Brachiomonas submarina                  | algal cells         | CCAC 0069 (M1823)                                    | M. Melkonian    |                            | 52                                 | 51744                  | Chlorophyceae                             | C                                            |               |  |
| MULF                                                                                                                                 | Green Algae         | Volvocales       | Chlamydomonadaceae | Chlamydomonas bialatus                  | algal cells         | SAG 7.72                                             | M. Melkonian    |                            | 53                                 | 53577                  | Chlorophyceae                             | D                                            |               |  |
| VALZ                                                                                                                                 | Green Algae         | Volvocales       | Chlamydomonadaceae | Chlamydomonas noctigama                 | algal cells         | SAG 36.72                                            | M. Melkonian    |                            | 54                                 | 54524                  | Chlorophyceae                             | D                                            |               |  |
| JRGJ                                                                                                                                 | Green Algae         | Volvocales       | Chlamydomonadaceae | Chlamydomonas moewusii                  | algal cells         | SAG 1.98                                             | M. Melkonian    |                            | 55                                 | 36079                  | Chlorophyceae                             | D                                            |               |  |
| GFUR                                                                                                                                 | Green Algae         | Volvocales       | Chlamydomonadaceae | Chloromonas subdivisa                   | algal cells         | SAG 67.72                                            | M. Melkonian    |                            | 56                                 | 95867                  | Chlorophyceae                             | D                                            |               |  |
| TSBQ                                                                                                                                 | Green Algae         | Volvocales       | Chlamydomonadaceae | Chlamydomonas sp.                       | algal cells         | M2762                                                | M. Melkonian    |                            | 57                                 | 61904                  | Chlorophyceae                             | D                                            |               |  |
| ACRY                                                                                                                                 | Green Algae         | Volvocales       | Phacotaceae        | Pteromonas sp.                          | algal cells         | M2761                                                | M. Melkonian    |                            | 58                                 | 43687                  | Chlorophyceae                             | E                                            |               |  |
| LNIL                                                                                                                                 | Green Algae         | Volvocales       | Phacotaceae        | Pteromonas angulosa                     | algal cells         | M2612                                                | M. Melkonian    |                            | 59                                 | 25461                  | Chlorophyceae                             | E                                            |               |  |
| ZIVZ                                                                                                                                 | Green Algae         | Volvocales       | Phacotaceae        | Phacotus lenticularis                   | algal cells         | SAG 61-1                                             | M. Melkonian    |                            | 60                                 | 52103                  | Chlorophyceae                             | E                                            |               |  |
| WRSL                                                                                                                                 | Green Algae         | Volvocales       | Volvoxaceae        | Volvox aureus                           | algal cells         | M2242                                                | M. Melkonian    |                            | 61                                 | 62468                  | Chlorophyceae                             | F                                            |               |  |
| JWGT                                                                                                                                 | Green Algae         | Volvocales       | Volvoxaceae        | Volvox aureus                           | algal cells         | M1028                                                | M. Melkonian    |                            | 62                                 | 63713                  | Chlorophyceae                             | F                                            |               |  |
| RJXJ                                                                                                                                 | Green Algae         | Volvocales       | Volvoxaceae        | Pandorina morum                         | algal cells         | CCAC 0063                                            | M. Melkonian    |                            | 63                                 | 64557                  | Chlorophyceae                             | F                                            |               |  |
| RNAT                                                                                                                                 | Green Algae         | Volvocales       | Volvoxaceae        | Eudorina elegans                        | algal cells         | CCAC 0011                                            | M. Melkonian    |                            | 64                                 | 59712                  | Chlorophyceae                             | F                                            |               |  |
| ISPU                                                                                                                                 | Green Algae         | Volvocales       | Volvoxaceae        | Volvox globator                         | algal cells         | ASW 05075                                            | M. Melkonian    |                            | 65                                 | 52127                  | Chlorophyceae                             | F                                            |               |  |
| IHOI                                                                                                                                 | Green Algae         | Volvocales       | Chlamydomonadaceae | Chloromonas oogama                      | algal cells         | SAG 9.79                                             | M. Melkonian    |                            | 66                                 | 30344                  | Chlorophyceae                             | F                                            |               |  |
| BCYF                                                                                                                                 | Green Algae         | Volvocales       | Chlamydomonadaceae | Chlamydomonas cribrum                   | algal cells         | SAG 13.72                                            | M. Melkonian    |                            | 67                                 | 47025                  | Chlorophyceae                             | F                                            |               |  |
| JKKI                                                                                                                                 | Green Algae         | Volvocales       | Chlamydomonadaceae | Lobomonas rostrata                      | algal cells         | SAG 45-1                                             | E. Kazamia      |                            | 68                                 | 58095                  | Chlorophyceae                             | F                                            |               |  |
| USIX                                                                                                                                 | Green Algae         | Chlorosarcinales | Chlorosarcinaceae  | Neochlorosarcina sp.                    | clonal culture, veg | M 2315                                               | M. Melkonian    |                            | 69                                 | 30224                  | Chlorophyceae                             | F                                            |               |  |
| QWRA                                                                                                                                 | Green Algae         | Volvocales       | Chlamydomonadaceae | Vitreochlamys sp.                       | algal cells         | M2074                                                | M. Melkonian    |                            | 70                                 | 59097                  | Chlorophyceae                             | F                                            |               |  |
| IRYH                                                                                                                                 | Green Algae         | Volvocales       | Chlamydomonadaceae | Heterochlamydomonas inaequalis          | algal cells         | SAG 4.75                                             | M. Melkonian    |                            | 71                                 | 37353                  | Chlorophyceae                             | F                                            |               |  |
| OFUE                                                                                                                                 | Green Algae         | Volvocales       | Chlamydomonadaceae | Lobochlamys segnis                      | algal cells         | SAG 50.84                                            | M. Melkonian    |                            | 72                                 | 47755                  | Chlorophyceae                             | F                                            |               |  |
| XDLL                                                                                                                                 | Green Algae         | Volvocales       | Chlamydomonadaceae | Oogamochlamys gigantea                  | algal cells         | SAG 44.91                                            | M. Melkonian    |                            | 73                                 | 50148                  | Chlorophyceae                             | F                                            |               |  |
| AJUU                                                                                                                                 | Green Algae         | Volvocales       | Chlamydomonadaceae | Chloromonas rosae                       | algal cells         | UTEX SNO 47                                          | M. Melkonian    |                            | 74                                 | 58510                  | Chlorophyceae                             | G                                            |               |  |
| LBRP                                                                                                                                 | Green Algae         | Volvocales       | Chlamydomonadaceae | Chloromonas reticulata                  | algal cells         | SAG 26.86                                            | M. Melkonian    |                            | 75                                 | 63012                  | Chlorophyceae                             | G                                            |               |  |
| AOUJ                                                                                                                                 | Green Algae         | Volvocales       | Chlamydomonadaceae | Chlamydomonas sp.                       | algal cells         | M2779                                                | M. Melkonian    |                            | 76                                 | 57048                  | Chlorophyceae                             | G                                            |               |  |
| UTRE                                                                                                                                 | Green Algae         | Volvocales       | Chlamydomonadaceae | Chloromonas tughillensis                | algal cells         | UTEX SNO 88                                          | M. Melkonian    |                            | 77                                 | 10300                  | Chlorophyceae                             | G                                            |               |  |
| FXHG                                                                                                                                 | Green Algae         | Volvocales       | Dunaliellaceae     | Hafniomonas reticulata                  | algal cells         | M0530/1                                              | M. Melkonian    |                            | 78                                 | 82903                  | Chlorophyceae                             | H                                            |               |  |
| RUIF                                                                                                                                 | Green Algae         | Volvocales       | Carteriaceae       | Carteria obtusa                         | algal cells         | SAG 39.84                                            | M. Melkonian    |                            | 79                                 | 54689                  | Chlorophyceae                             | H                                            |               |  |
| VIAU                                                                                                                                 | Green Algae         | Volvocales       | Carteriaceae       | Carteria crucifera                      | algal cells         | SAG 8-7a                                             | M. Melkonian    |                            | 80                                 | 64474                  | Chlorophyceae                             | H                                            |               |  |
| XTON                                                                                                                                 | Green Algae         | Chlorococcales   | Hydrodictyaceae    | Pediastrum duplex CCAC 0147             | algal cells         | CCAC 0147                                            | M. Melkonian    |                            | 81                                 | 50064                  | Chlorophyceae                             | H                                            |               |  |
| XKWQ                                                                                                                                 | Green Algae         | Chlorococcales   | Hydrodictyaceae    | Pediastrum duplex CCAC 0012             | algal cells         | CCAC 0012 (M0549)                                    | M. Melkonian    |                            | 82                                 | 38322                  | Chlorophyceae                             | H                                            |               |  |
| VIDZ                                                                                                                                 | Green Algae         | Trebouxiiales    | Botryococcaceae    | Botryococcus sudeticus                  | algal cells         | UTEX 2629                                            | N. Clarke       |                            | 83                                 | 41539                  | Trebouxiophyceae                          | H                                            |               |  |
| PZIF                                                                                                                                 | Green Algae         | Chlorococcales   | Scenedesmeceae     | Scenedesmus dimorphus                   | cells grown on 3N   | UTEX 746                                             | N. Clarke       |                            | 84                                 | 56356                  | Chlorophyceae                             | H                                            |               |  |
| MWAN                                                                                                                                 | Green Algae         | Chlorococcales   | Chlorellaceae      | Chlorella minutissima                   | cells grown on F/2  | UTEX 2219                                            | N. Clarke       |                            | 85                                 | 36163                  | Trebouxiophyceae                          | H                                            |               |  |
| OTQG                                                                                                                                 | Green Algae         | Sphaeropleales   | Ankistrodesmaceae  | Ankistrodesmus sp.                      | algal cells         | M3332                                                | M. Melkonian    |                            | 86                                 | 31799                  | Chlorophyceae                             | H                                            |               |  |
| BZSH                                                                                                                                 | Green Algae         | Chlorococcales   | Golenkinaceae      | Golenkinia longispicula                 | algal cells         | SAG 73.80                                            | M. Melkonian    |                            | 87                                 | 37735                  | Chlorophyceae                             | H                                            |               |  |
| ENAU                                                                                                                                 | Green Algae         | Volvocales       | Chlamydomonadaceae | Spermatozopsis similis                  | algal cells         | CCAC 0013 (M0563/1)                                  | M. Melkonian    |                            | 88                                 | 21774                  | Chlorophyceae                             | H                                            |               |  |
| MXDS                                                                                                                                 | Green Algae         | Volvocales       | Chlamydomonadaceae | Spermatozopsis exsultans                | algal cells         | M0562                                                | M. Melkonian    |                            | 89                                 | 27853                  | Chlorophyceae                             | H                                            |               |  |
| DZPJ                                                                                                                                 | Green Algae         | Ultrichales      | Cylindrocapsaceae  | Cylindrocapsa geminella                 | algal cells         | SAG 3.87                                             | M. Melkonian    |                            | 90                                 | 54221                  | Ulvothyceae                               | H                                            |               |  |
| JMUI                                                                                                                                 | Green Algae         | Chaetophorales   | Chaetophoraceae    | Stigeoclonium helveticum                | algal cells         | SAG 477-1                                            | M. Melkonian    |                            | 91                                 | 56140                  | Chlorophyceae                             | I                                            |               |  |
| VFIV                                                                                                                                 | Green Algae         | Chaetophorales   | Chaetophoraceae    | Fritschiella tuberosa                   | algal cells         | SAG 112.8                                            | M. Melkonian    |                            | 92                                 | 48720                  | Chlorophyceae                             | I                                            |               |  |
| ISGT                                                                                                                                 | Green Algae         | Chaetophorales   | Chaetophoraceae    | Uronema sp.                             | algal cells         | CCAP 334/1                                           | M. Melkonian    | 6                          | 93                                 | 41559                  | Chlorophyceae                             | I                                            |               |  |

|      |                     |                      |                       |                                  |                     |                      |              |    |     |        |                     |   |   |
|------|---------------------|----------------------|-----------------------|----------------------------------|---------------------|----------------------|--------------|----|-----|--------|---------------------|---|---|
| RAWF | Green Algae         | Chaetophorales       | Chaetophoraceae       | Uronema belkae                   | algal cells         | SAG 34.86            | M. Melkonian |    | 94  | 43871  | Chlorophyceae       | I |   |
| IJMT | Green Algae         | Chaetophorales       | Aphanochaetaceae      | Aphanochaete repens              | algal cells         | M2226                | M. Melkonian |    | 95  | 92039  | Chlorophyceae       | I |   |
| SDPC | Green Algae         | Oedogoniales         | Oedogoniaceae         | Oedogonium foveolatum            | algal cells         | UTEX LB 933          | M. Melkonian |    | 96  | 71612  | Chlorophyceae       | I |   |
| DVYE | Green Algae         | Oedogoniales         | Oedogoniaceae         | Oedogonium cardiacum             | algal cells         | SAG 575-1a           | M. Melkonian |    | 97  | 80265  | Chlorophyceae       | I |   |
| BAZF | Green Algae         | Chaetopeltidales     | Chaetopeltidaceae     | Chaetopeltis orbicularis         | algal cells         | SAG 21.98            | M. Melkonian |    | 98  | 72685  | Chlorophyceae       | I |   |
| JTIG | Green Algae         | Bryopsidales         | Bryopsidaceae         | Bryopsis plumosa                 | algal cells         | KU 272               | M. Melkonian | 7  | 99  | 33234  | Ulvothycidae        | J |   |
| GYBH | Green Algae         | Bryopsidales         | Codiaceae             | Codium fragile                   | algal cells         | KU 654               | M. Melkonian |    | 100 | 23572  | Ulvothycidae        | J |   |
| ETGN | Green Algae         | Trebouxiiales        | Botryococcaceae       | Botryococcus braunii             | cells grown on 3N   | UTEX 2441            | N. Clarke    |    | 101 | 62493  | Trebouxiophyceae    | K |   |
| QXYX | Green Algae         | Trebouxiiales        | Botryococcaceae       | Botryococcus terribilis          | algal cells         | ASW 05049            | M. Melkonian |    | 102 | 49754  | Trebouxiophyceae    | K |   |
| GXBM | Green Algae         | Chlorococcales       | Coccomyxaaceae        | Coccomyxa pringsheimii           | algal cells         | SAG 216-7            | M. Melkonian |    | 103 | 17042  | Chlorophyceae       | K |   |
| NKXU | Green Algae         | Trebouxiiales        | Trebouxiaceae         | Trebouxia arboricola             | algal cells         | SAG 219-1a           | M. Melkonian |    | 104 | 28139  | Trebouxiophyceae    | K |   |
| ZNUM | Green Algae         | Chlorellales         | Leptosiraceae         | Leptosira obovata                | algal cells         | SAG 445-1            | M. Melkonian |    | 105 | 26849  | Trebouxiophyceae    | K |   |
| WXRI | Green Algae         | Prasiolales          | Prasiolaceae          | Stichococcus bacillaris          | algal cells         | CCAC 0076 (M1897/1)  | M. Melkonian |    | 106 | 30268  | Trebouxiophyceae    | K |   |
| WCLV | Green Algae         | Prasiolales          | Prasiolaceae          | Prasiola crispa                  | algal cells         | SAG 43.96            | M. Melkonian |    | 107 | 19130  | Trebouxiophyceae    | K |   |
| EJJO | Green Algae         | Volvocales           | incertae sedis        | Neochloris oleoabundans          | cells grown on 3N   | UTEX 1185            | N. Clarke    | 8  | 108 | 40853  | Chlorophyceae       | K |   |
| AKCR | Green Algae         | Chlorellales         | Chlorellaceae         | Parachlorella kesslerii          | algal cells         | SAG 10.80            | M. Melkonian |    | 109 | 24207  | Trebouxiophyceae    | K |   |
| BILC | Green Algae         | Chlorellales         | Chlorellaceae         | Prototheca wickerhamii           | algal cells         | SAG 263-11           | M. Melkonian |    | 110 | 21751  | Trebouxiophyceae    | K |   |
| JQFK | [Chromista (Algae)  | [Eustigmatales]      | [Monodopsidaceae]     | Picochlorum atomus               | cells grown on F/2  | UTEX LB 1998         | N. Clarke    | 9  | 111 | 80376  | Trebouxiophyceae    | K |   |
| MNCB | Green Algae         | Chlorellales         | Oocystaceae           | Eremosphaera viridis             | algal cells         | M0511b               | M. Melkonian |    | 112 | 37155  | Trebouxiophyceae    | K |   |
| MFYC | Green Algae         | Chlorellales         | Chlorellaceae         | Nannochloris atomus              | algal cells         | SAG 14.87            | M. Melkonian |    | 113 | 32696  | Trebouxiophyceae    | K |   |
| HXXJ | Green Algae         | Chlorodendrales      | Chlorodendraceae      | Tetraselmis striata              | algal cells         | PLY 443              | M. Melkonian |    | 114 | 42711  | Chlorodendrophyceae | L |   |
| HVNO | Green Algae         | Chlorodendrales      | Chlorodendraceae      | Tetraselmis chui                 | cells grown on F/2  | UTEX LB 232          | N. Clarke    |    | 115 | 66049  | Chlorodendrophyceae | L |   |
| DUMA | Green Algae         | Chlorodendrales      | Chlorodendraceae      | Tetraselmis cordiformis          | algal cells         | CCAC 0051 (M1608/1)  | M. Melkonian |    | 116 | 36828  | Chlorodendrophyceae | L |   |
| FMBV | Green Algae         | Chlorodendrales      | Chlorodendraceae      | Scherffelia dubia                | algal cells         | CCAC 0019 (M0795)    | M. Melkonian |    | 117 | 38398  | Chlorodendrophyceae | L |   |
| PUAN | Green Algae         | Pedinomonadales      | Pedinomonadaceae      | Pedinomonas tuberculata          | algal cells         | CCAC 1965/2          | M. Melkonian |    | 118 | 22957  | Pedinophyceae       | L |   |
| RRSV | Green Algae         | Pedinomonadales      | Pedinomonadaceae      | Pedinomonas minor                | algal cells         | SAG 1965-3           | M. Melkonian |    | 119 | 23185  | Pedinophyceae       | L |   |
| AYPS | Green Algae         | incertae sedis       | incertae sedis        | unidentified species             | algal cells         | CCMP 1205            | M. Melkonian |    | 120 | 11362  |                     | L |   |
| TGNL | Green Algae         | incertae sedis       | incertae sedis        | Picocystis salinarum             | algal cells         | CCMP 1897            | M. Melkonian |    | 121 | 9806   |                     | L |   |
| MMKU | Green Algae         | Nephroselmiales      | Nephroselmidiaceae    | Nephroselmis olivacea            | algal cells         | CCAC 0105            | M. Melkonian |    | 122 | 51161  | Nephrophyceae       | L | + |
| ISIM | Green Algae         | Nephroselmiales      | Nephroselmidiaceae    | Nephroselmis pyriformis          | algal cells         | CCMP 717             | M. Melkonian |    | 123 | 37155  | Nephrophyceae       | L | + |
| MCPK | Green Algae         | Mamiellales          | Mamiellaceae          | Bathycoccus prasinos             | algal cells         | SCCAP K-0417         | M. Melkonian |    | 124 | 15089  | Mamiellophyceae     | M | + |
| QX5Z | Green Algae         | Mamiellales          | Mamiellaceae          | Mantiella squamata               | algal cells         | CCAP 1965/1          | M. Melkonian |    | 125 | 43084  | Mamiellophyceae     | M | + |
| BTFM | Green Algae         | Mamiellales          | Monomastixaceae       | Monomastix opisthostigma         | algal cells         | CCAC 0206 (M2844/1)  | M. Melkonian |    | 126 | 51094  | Mamiellophyceae     | M | + |
| XOAL | Green Algae         | Dolichomastigales    | Dolichomastigaceae    | Dolichomastix tenuilepis         | algal cells         | M1680                | M. Melkonian |    | 127 | 45061  | Mamiellophyceae     | M | + |
| TNAW | Green Algae         | Pyramimonadales      | Pyramimonadaceae      | Pyramimonas parkeae              | algal cells         | CCAC 0082 (M1663/1)  | M. Melkonian |    | 128 | 78788  | Pyramimonadophyceae | M | + |
| JMTE | Green Algae         | Pseudoscurfieldiales | Pseudoscurfieldiaceae | Pseudoscurfieldia marina         | algal cells         | SCCAP K-0017         | M. Melkonian |    | 129 | 18581  | Pyramimonadophyceae | M | + |
| EGNB | Green Algae         | Scourfieldiales      | Scourfieldiaceae      | Scourfieldia sp.                 | algal cells         | M0560/2              | M. Melkonian |    | 130 | 30256  | Pedinophyceae       | M |   |
| HYHN | Green Algae         | Prasinococcales      | Prasinococcaceae      | Prasinoderma coloniale           | algal cells         | CCMP 1413            | M. Melkonian |    | 131 | 16559  |                     |   |   |
| XMCL | Green Algae         | Prasinococcales      | Prasinococcaceae      | Prasinococcus capsulatus         | algal cells         | CCMP 1194            | M. Melkonian |    | 132 | 16474  |                     |   |   |
| AZZW | Green Algae         | Klebsormidiales      | Klebsormidiaceae      | Chlorokybus atmophyticus         | clonal culture, veg | M 2923               | M. Melkonian |    | 133 | 21920  |                     |   |   |
| NNHQ | Green Algae         | Zygnematales         | Mesotaeniaceae        | Spirotaenia minuta               | clonal culture, veg | M 2661               | M. Melkonian |    | 134 | 34193  |                     |   |   |
| KYIO | Green Algae         | Mesostigmatales      | Mesostigmataceae      | Mesostigma viride                | clonal, axenic cult | SAG 50-1             | M. Melkonian |    | 135 | 37189  |                     |   |   |
| FQLP | Green Algae         | Klebsormidiales      | Klebsormidiaceae      | Klebsormidium subtile            | clonal, axenic cult | M 1894/1 (CCAC 0119) | M. Melkonian |    | 136 | 33647  |                     |   |   |
| FPCC | Green Algae         | Ulotrichales         | Ulotrichaceae         | Interfilum paradoxum             | algal cells         | SAG 338-1            | M. Melkonian |    | 137 | 30434  |                     |   |   |
| BFIK | Green Algae         | Klebsormidiales      | Klebsormidiaceae      | Entansia fimbriata               | algal cells         | UTEX LB 2353         | M. Melkonian |    | 138 | 31044  |                     |   |   |
| MWXT | Green Algae         | Charales             | Characeae             | Chara vulgaris                   | clonal culture, veg | M 3183               | M. Melkonian |    | 139 | 76087  |                     |   |   |
| VOBJ | Green Algae         | Coleochaetales       | Coleochaetaceae       | Coleochaete scutata              | clonal, axenic cult | SAG 110.80M (M 1311) | M. Melkonian |    | 140 | 45338  |                     |   |   |
| QPDY | Green Algae         | Coleochaetales       | Coleochaetaceae       | Coleochaete irregularis          | algal cells         | UTEX LB 2790         | M. Melkonian |    | 141 | 31619  |                     |   |   |
| DRGY | Green Algae         | Coleochaetales       | Chaetosphaeriidae     | Chaetosphaeridium globosum       | clonal, axenic cult | M 1311 (CCAC 0044)   | M. Melkonian |    | 142 | 37188  |                     |   |   |
| HAOX | Green Algae         | Zygnematales         | Zygnemataceae         | Spirogyra sp.                    | clonal culture, veg | M 1810               | M. Melkonian |    | 143 | 25273  |                     |   |   |
| WSJO | Green Algae         | Zygnematales         | Mesotaeniaceae        | Mesotaenium braunii              | algal cells         | M2214                | M. Melkonian |    | 144 | 49049  |                     |   |   |
| WDCW | Green Algae         | Zygnematales         | Mesotaeniaceae        | Mesotaenium endlicherianum       | algal cells         | SAG 12.97            | M. Melkonian |    | 145 | 48633  |                     |   |   |
| YOXI | Green Algae         | Zygnematales         | Mesotaeniaceae        | Cylindrocystis brebissonii       | algal cells         | M2213                | M. Melkonian |    | 146 | 56995  |                     |   |   |
| RPLG | Green Algae         | Zygnematales         | Mesotaeniaceae        | Cylindrocystis brebissonii       | algal cells         | M2853                | M. Melkonian |    | 147 | 114760 |                     |   |   |
| HKZW | Green Algae         | Zygnematales         | Mesotaeniaceae        | Mesotaenium caldariorum          | algal cells         | SAG 648-1            | M. Melkonian |    | 148 | 48636  |                     |   |   |
| JOJQ | Green Algae         | Zygnematales         | Zygnemataceae         | Cylindrocystis cushleackae       | algal cells         | M2158                | M. Melkonian |    | 149 | 41982  |                     |   |   |
| MFZO | Green Algae         | Zygnematales         | Zygnemataceae         | Zygnemopsis sp.                  | algal cells         | CCAP 699/1           | M. Melkonian |    | 150 | 27548  |                     |   |   |
| FFGR | Green Algae         | Zygnematales         | Mesotaeniaceae        | Netrium digitus                  | clonal, axenic cult | M 1322/1 (CCAC 0148) | M. Melkonian |    | 151 | 47993  |                     |   |   |
| KMNX | Green Algae         | Zygnematales         | Mesotaeniaceae        | Nucleotaenium eifelense          | algal cells         | M3006                | M. Melkonian |    | 152 | 38154  |                     |   |   |
| SNOX | Green Algae         | Zygnematales         | Mesotaeniaceae        | Planotaenium ohtanii             | algal cells         | M 2697               | M. Melkonian |    | 153 | 24792  |                     |   |   |
| XRTZ | Green Algae         | Zygnematales         | Mesotaeniaceae        | Roya obtusa                      | algal cells         | M2403                | M. Melkonian |    | 154 | 27653  |                     |   |   |
| KEYW | Green Algae         | Zygnematales         | Gonatozygaceae        | Gonatozygon kinahani             | algal cells         | M2935                | M. Melkonian |    | 155 | 28183  |                     |   |   |
| DRFX | Green Algae         | Zygnematales         | Closteriaceae         | Closterium lunula                | algal cells         | M2156                | M. Melkonian |    | 156 | 81203  |                     |   |   |
| AEKF | Green Algae         | Zygnematales         | Peniaceae             | Penium margaritaceum             | algal cells         | SAG 22.82            | M. Melkonian |    | 157 | 48819  |                     |   |   |
| YSOT | Green Algae         | Zygnematales         | Peniaceae             | Penium exiguum                   | algal cells         | CCAC 0142 (M2159/1)  | M. Melkonian |    | 158 | 36931  |                     |   |   |
| RPOV | Green Algae         | Zygnematales         | Desmidiaceae          | Phymatodocis nordstedtiana       | algal cells         | SVCK 327             | M. Melkonian |    | 159 | 37309  |                     |   |   |
| HIDG | Green Algae         | Zygnematales         | Desmidiaceae          | Cosmarium broomei                | clonal, axenic cult | M 2075/1 (CCAC 0143) | M. Melkonian | 10 | 160 | 66229  |                     |   |   |
| RQFE | Green Algae         | Zygnematales         | Desmidiaceae          | Cosmocladium cf. constrictum     | algal cells         | ASW 07118 (M1361)    | M. Melkonian |    | 161 | 38344  |                     |   |   |
| GYRP | Green Algae         | Zygnematales         | Desmidiaceae          | Euastrum affine                  | algal cells         | ASW 07012            | M. Melkonian |    | 162 | 104323 |                     |   |   |
| MNNM | Green Algae         | Zygnematales         | Desmidiaceae          | Cosmarium granatum               | algal cells         | CCAC 0137 (M2127/1)  | M. Melkonian |    | 163 | 44947  |                     |   |   |
| ISHC | Green Algae         | Zygnematales         | Desmidiaceae          | Staurastrum sebaldi              | algal cells         | M1129                | M. Melkonian |    | 164 | 46452  |                     |   |   |
| QWVJ | Green Algae         | Zygnematales         | Desmidiaceae          | Bambusina borrieri               | algal cells         | CCAC 0045 (M1320)    | M. Melkonian |    | 165 | 83393  |                     |   |   |
| DFDS | Green Algae         | Zygnematales         | Desmidiaceae          | Desmidium aptogonum              | algal cells         | ASW 07112            | M. Melkonian |    | 166 | 41347  |                     |   |   |
| GGWH | Green Algae         | Zygnematales         | Desmidiaceae          | Onychonema laeve                 | algal cells         | CCAC 0151 (M2246/1)  | M. Melkonian |    | 167 | 49390  |                     |   |   |
| WCQU | Green Algae         | Zygnematales         | Desmidiaceae          | Staurodesmus convergens          | algal cells         | M2558                | M. Melkonian |    | 168 | 63206  |                     |   |   |
| BHKB | Green Algae         | Zygnematales         | Desmidiaceae          | Cosmarium tinctum                | algal cells         | M2301                | M. Melkonian |    | 169 | 51220  |                     |   |   |
| RPRU | Green Algae         | Zygnematales         | Desmidiaceae          | Staurodesmus omearii             | algal cells         | M0751                | M. Melkonian |    | 170 | 43362  |                     |   |   |
| MCHJ | Green Algae         | Zygnematales         | Desmidiaceae          | Micrasterias fimbriata           | algal cells         | ASW 07026 (M1188)    | M. Melkonian |    | 171 | 64972  |                     |   |   |
| GBGT | Green Algae         | Zygnematales         | Desmidiaceae          | Xanthidium antilopaeum           | algal cells         | M1229                | M. Melkonian |    | 172 | 105757 |                     |   |   |
| MOYY | Green Algae         | Zygnematales         | Desmidiaceae          | Pleurotaenium trabecula          | algal cells         | CCAC 0163            | M. Melkonian |    | 173 | 99058  |                     |   |   |
| STKJ | Green Algae         | Zygnematales         | Desmidiaceae          | Cosmarium ochthodes              | algal cells         | M1384                | M. Melkonian |    | 174 | 99850  |                     |   |   |
| WDGV | Green Algae         | Zygnematales         | Desmidiaceae          | Cosmarium submedium              | algal cells         | M3067                | M. Melkonian |    | 175 | 56528  |                     |   |   |
| MXEZ | Green Algae         | Pseudoscurfieldiales | Pycnococcaceae        | Pycnococcus provasolii           | algal cells         | CCMP 1203            | M. Melkonian |    | 176 | 15322  |                     |   |   |
| MJMQ | Chromista (Algae)   | Pyrenomonadales      | Chroomonadaceae       | Hemiselmis virescens             | algal cells         | M1635                | M. Melkonian |    | -   | 42834  |                     |   |   |
| YTYU | Glaucochyta (Algae) | Glaucochytales       | Glaucochytaeaceae     | Cyanophora paradoxa CCAC 0091 (N | algal cells         | CCAC 0091 M0507/1    | M. Melkonian |    | -   | 34058  |                     |   |   |
| DXNY | Green Algae         | Microthamniales      | Microthamniaceae      | Microthamnia kuetzingiana        | algal cells         | CCAC 0054 (M0423)    | M. Melkonian |    | -   | 43557  |                     |   |   |
| AGIO | Green Algae         | Volvocales           | Haematococcaceae      | Haematococcus pluvialis          | algal cells         | CCAC 0055 (M0716/1)  | M. Melkonian |    | -   | 61126  |                     |   |   |
| ODXI | Green Algae         | Volvocales           | Haematococcaceae      | Haematococcus pluvialis          | algal cells (red)   | CCAC 0055            | M. Melkonian |    | -   | 82149  |                     |   |   |
| NTLE | Green Algae         | Volvocales           | Asteromonadaceae      | Asteromonas gracilis             | algal cells         | CCAC 0049 (M1491)    | M. Melkonian |    | -   | 53714  |                     |   |   |
| HVMV | Green Algae         | Zygnematales         | Desmidiaceae          | Cosmarium ochthodes              | algal cells         | ASW 07133            | M. Melkonian |    | -   | 111788 |                     |   |   |

Notes from OneKP site:

- 1 weak RNA
- 2 originally submitted as D. primolecta, but appears to be identical to ZDIZ/CCMP 364
- 3 Originally submitted as UTEX LB 1644 D. salina, but the sequence was matched to S. viridis
- 4 was Chloromonas perforata (see doi:10.1111/jpy.12343)
- 5 was Pleurastrum insigne (see doi: 10.1111/jpy.12343)
- 6 originally recorded as Hormidiella sp.
- 7 weak RNA
- 8 was synonym Neochloris oleoabundans
- 9 was originally Nannochloropsis oculata
- 10 resent; few big contigs

| Supp. Table 2:                  |                               |            |  | -log(p-val) <sup>3</sup> |                       |
|---------------------------------|-------------------------------|------------|--|--------------------------|-----------------------|
| HMM name <sup>1</sup>           | functional group <sup>2</sup> | sub-group  |  | 5 major clades           | most sig. Chlorophyte |
| ec2.7.1.19                      | carbon assimilation           |            |  | 0.3                      | 1.6                   |
| ec4.1.1.39                      | carbon assimilation           |            |  | 0.1                      | 0.5                   |
| ec4.1.2.13                      | carbon assimilation           |            |  | 0.0                      | 0.8                   |
| ec5.1.3.1                       | carbon assimilation           |            |  | 0.0                      | 0.0                   |
| ec5.3.1.6                       | carbon assimilation           |            |  | 0.1                      | 1.2                   |
| PF00016                         | carbon assimilation           |            |  | 0.0                      | 0.8                   |
| PF00101                         | carbon assimilation           |            |  | 0.2                      | 0.5                   |
| PF00194                         | carbon assimilation           |            |  | 6.6                      | 1.6                   |
| PF00484                         | carbon assimilation           |            |  | 11.3                     | 1.0                   |
| PF02788                         | carbon assimilation           |            |  | 0.9                      | 0.5                   |
| Rubisco_activase                | carbon assimilation           |            |  | 33.0                     | 0.0                   |
| ec1.1.1.157                     | central carbon                |            |  | 0.6                      | 0.3                   |
| ec1.1.1.30                      | central carbon                |            |  | 0.0                      | 0.0                   |
| ec1.1.1.37                      | central carbon                |            |  | 0.0                      | 0.0                   |
| ec1.1.1.38                      | central carbon                |            |  | 0.0                      | 0.8                   |
| ec1.1.1.40                      | central carbon                |            |  | 0.2                      | 0.9                   |
| ec1.1.5.3                       | central carbon                |            |  | 0.3                      | 0.9                   |
| ec1.2.1.12                      | central carbon                |            |  | 0.0                      | 0.0                   |
| ec1.2.1.13                      | central carbon                |            |  | 0.4                      | 0.0                   |
| ec1.2.1.9                       | central carbon                |            |  | 0.4                      | 0.9                   |
| ec2.3.1.9                       | central carbon                |            |  | 0.0                      | 0.9                   |
| ec2.3.3.1                       | central carbon                |            |  | 0.5                      | 0.9                   |
| ec2.3.3.9                       | central carbon                |            |  | 11.4                     | 6.3                   |
| ec2.7.2.3                       | central carbon                |            |  | 0.1                      | 0.6                   |
| ec2.7.9.1                       | central carbon                |            |  | 0.8                      | 4.0                   |
| ec3.1.3.11                      | central carbon                |            |  | 0.0                      | 0.9                   |
| ec3.1.3.37                      | central carbon                |            |  | 0.6                      | 0.9                   |
| ec4.1.1.3                       | central carbon                |            |  | 20.0                     | 2.1                   |
| ec4.1.1.32                      | central carbon                |            |  | 6.9                      | 0.8                   |
| ec4.1.1.49                      | central carbon                |            |  | 8.3                      | 1.9                   |
| ec4.1.3.1                       | central carbon                |            |  | 8.9                      | 6.3                   |
| ec5.3.1.1                       | central carbon                |            |  | 0.4                      | 0.9                   |
| ec6.2.1.1                       | central carbon                |            |  | 0.0                      | 0.6                   |
| ec6.4.1.3                       | central carbon                |            |  | 0.3                      | 1.2                   |
| ec6.4.1.4                       | central carbon                |            |  | 0.0                      | 0.9                   |
| oxoglutarate-malate transporter | central carbon                |            |  | 30.2                     | 0.9                   |
| ec1.1.1.101                     | mebrane lipid                 | backbone   |  | 0.9                      | 0.8                   |
| ec1.1.1.94                      | mebrane lipid                 | backbone   |  | 3.9                      | 1.0                   |
| ec2.3.1.23                      | mebrane lipid                 | backbone   |  | 1.5                      | 1.3                   |
| ec2.3.1.51                      | mebrane lipid                 | backbone   |  | 0.0                      | 0.9                   |
| ec2.7.1.107                     | mebrane lipid                 | backbone   |  | 6.4                      | 1.8                   |
| ec2.7.1.30                      | mebrane lipid                 | backbone   |  | 0.1                      | 0.7                   |
| ec2.7.7.41                      | mebrane lipid                 | backbone   |  | 0.2                      | 0.9                   |
| ec2.7.8.5                       | membrane lipid                | backbone   |  | 1.1                      | 0.7                   |
| ec3.1.1.5                       | membrane lipid                | backbone   |  | 0.8                      | 0.7                   |
| ec3.1.3.27                      | membrane lipid                | backbone   |  | 0.0                      | 0.9                   |
| ec3.1.3.4                       | membrane lipid                | backbone   |  | 3.5                      | 1.9                   |
| ec3.1.4.3                       | membrane lipid                | backbone   |  | 9.1                      | 0.7                   |
| PF03062                         | membrane lipid                | backbone   |  | 0.9                      | 0.9                   |
| acyl carrier protein            | membrane lipid                | fatty acid |  | 0.0                      | 0.8                   |
| ec1.1.1.100                     | membrane lipid                | fatty acid |  | 0.0                      | 0.0                   |
| ec1.14.19.1                     | membrane lipid                | fatty acid |  | 2.5                      | 0.6                   |
| ec1.14.19.2                     | membrane lipid                | fatty acid |  | 26.2                     | 0.0                   |
| ec1.14.19.3                     | membrane lipid                | fatty acid |  | 3.2                      | 1.7                   |
| ec1.14.19.4                     | membrane lipid                | fatty acid |  | 11.6                     | 1.9                   |
| ec1.14.99.33                    | membrane lipid                | fatty acid |  | 0.6                      | 1.0                   |

|             |                  |                     |  |      |     |
|-------------|------------------|---------------------|--|------|-----|
| ec1.3.1.38  | membrane lipid   | fatty acid          |  | 1.6  | 1.5 |
| ec1.3.1.9   | membrane lipid   | fatty acid          |  | 1.1  | 0.6 |
| ec1.3.3.6   | membrane lipid   | fatty acid          |  | 5.5  | 0.9 |
| ec1.3.99.3  | membrane lipid   | fatty acid          |  | 0.3  | 0.8 |
| ec2.3.1.16  | membrane lipid   | fatty acid          |  | 0.0  | 0.9 |
| ec2.3.1.179 | membrane lipid   | fatty acid          |  | 0.0  | 0.0 |
| ec2.3.1.180 | membrane lipid   | fatty acid          |  | 6.7  | 0.6 |
| ec2.3.1.181 | membrane lipid   | fatty acid          |  | 0.7  | 1.7 |
| ec2.3.1.39  | membrane lipid   | fatty acid          |  | 0.4  | 0.6 |
| ec3.1.2.14  | membrane lipid   | fatty acid          |  | 12.2 | 2.1 |
| ec3.1.2.20  | membrane lipid   | fatty acid          |  | 2.5  | 1.8 |
| ec3.1.2.22  | membrane lipid   | fatty acid          |  | 15.1 | 0.3 |
| ec4.2.1.17  | membrane lipid   | fatty acid          |  | 0.0  | 0.4 |
| ec4.2.1.60  | membrane lipid   | fatty acid          |  | 0.5  | 0.5 |
| ec6.2.1.3   | membrane lipid   | fatty acid          |  | 0.0  | 0.0 |
| ec6.4.1.2   | membrane lipid   | fatty acid          |  | 0.0  | 0.9 |
| ec2.1.1.103 | membrane lipid   | headgroup           |  | 2.5  | 4.7 |
| ec2.3.1.50  | membrane lipid   | headgroup           |  | 0.5  | 0.9 |
| ec2.7.1.32  | membrane lipid   | headgroup           |  | 3.1  | 1.8 |
| ec2.7.1.82  | membrane lipid   | headgroup           |  | 4.1  | 1.8 |
| ec2.7.7.14  | membrane lipid   | headgroup           |  | 1.4  | 1.6 |
| ec2.7.7.15  | membrane lipid   | headgroup           |  | 4.9  | 1.4 |
| ec2.7.8.1   | membrane lipid   | headgroup           |  | 2.2  | 1.1 |
| ec2.7.8.11  | membrane lipid   | headgroup           |  | 0.3  | 0.5 |
| ec2.7.8.2   | membrane lipid   | headgroup           |  | 2.1  | 1.1 |
| ec2.7.8.24  | membrane lipid   | headgroup           |  | 17.4 | 0.6 |
| ec3.1.3.75  | membrane lipid   | headgroup           |  | 4.0  | 2.6 |
| ec3.13.1.1  | membrane lipid   | headgroup           |  | 0.0  | 0.9 |
| PF04191     | membrane lipid   | headgroup           |  | 22.3 | 0.8 |
| PF11899     | membrane lipid   | headgroup           |  | 12.1 | 3.5 |
| ec2.4.1.241 | membrane lipid   | headgroup           |  | 2.9  | 1.9 |
| ec2.4.1.46  | membrane lipid   | headgroup           |  | 0.1  | 2.1 |
| ec2.3.1.158 | triacylglyceride |                     |  | 1.9  | 1.5 |
| ec2.3.1.20  | triacylglyceride |                     |  | 2.9  | 2.1 |
| ec3.1.1.3   | triacylglyceride |                     |  | 0.1  | 1.2 |
| PF03982     | triacylglyceride |                     |  | 8.1  | 1.6 |
| ec2.5.1.1   | terpenoid        | downstream from IPP |  | 0.4  | 0.0 |
| ec2.5.1.10  | terpenoid        | downstream from IPP |  | 0.4  | 0.0 |
| ec2.5.1.29  | terpenoid        | downstream from IPP |  | 0.2  | 0.4 |
| ec2.5.1.32  | terpenoid        | downstream from IPP |  | 0.0  | 0.6 |
| ec5.3.3.2   | terpenoid        | downstream from IPP |  | 0.6  | 1.6 |
| ec1.1.1.267 | terpenoid        | MEP/DOXP            |  | 0.6  | 0.8 |
| ec1.17.1.2  | terpenoid        | MEP/DOXP            |  | 0.2  | 0.9 |
| ec1.17.7.1  | terpenoid        | MEP/DOXP            |  | 0.3  | 1.2 |
| ec2.2.1.7   | terpenoid        | MEP/DOXP            |  | 0.2  | 0.6 |
| ec2.7.1.148 | terpenoid        | MEP/DOXP            |  | 1.9  | 0.7 |
| ec2.7.7.60  | terpenoid        | MEP/DOXP            |  | 14.5 | 0.5 |
| ec4.6.1.12  | terpenoid        | MEP/DOXP            |  | 2.0  | 0.0 |
| ec1.1.1.34  | terpenoid        | MVA                 |  | 18.2 | 0.9 |
| ec1.1.1.88  | terpenoid        | MVA                 |  | 1.1  | 0.0 |
| ec2.3.3.10  | terpenoid        | MVA                 |  | 10.0 | 4.5 |
| ec2.7.1.36  | terpenoid        | MVA                 |  | 1.0  | 0.8 |
| ec2.7.4.2   | terpenoid        | MVA                 |  | 13.7 | 0.8 |
| ec4.1.1.33  | terpenoid        | MVA                 |  | 28.1 | 1.4 |
| ec2.1.1.14  | vitamin          | B12                 |  | 1.4  | 2.0 |
| PF00809     | vitamin          | B12                 |  | 0.2  | 1.1 |
| PF01717     | vitamin          | B12                 |  | 1.5  | 2.3 |
| PF02310     | vitamin          | B12                 |  | 0.4  | 1.5 |
| PF02574     | vitamin          | B12                 |  | 0.2  | 0.4 |
| PF02607     | vitamin          | B12                 |  | 0.1  | 0.9 |
| PF02965     | vitamin          | B12                 |  | 0.1  | 1.2 |



|            |         |               |  |      |     |
|------------|---------|---------------|--|------|-----|
| PF08267    | vitamin | B12           |  | 1.5  | 1.5 |
| ec1.1.1.65 | vitamin | B6            |  | 0.2  | 0.4 |
| ec1.2.1.72 | vitamin | B6            |  | 0.2  | 0.9 |
| ec1.4.3.5  | vitamin | B6            |  | 5.3  | 4.3 |
| ec2.3.1.47 | vitamin | B6            |  | 0.0  | 0.9 |
| ec2.6.1.52 | vitamin | B6            |  | 0.0  | 0.9 |
| ec2.7.1.35 | vitamin | B6            |  | 0.9  | 1.2 |
| ec3.1.3.74 | vitamin | B6            |  | 1.7  | 0.8 |
| ec4.2.3.1  | vitamin | B6            |  | 0.0  | 0.6 |
| PF01174    | vitamin | B6            |  | 0.4  | 1.0 |
| ec2.6.1.62 | vitamin | biotin        |  | 1.0  | 0.7 |
| ec2.8.1.6  | vitamin | biotin        |  | 0.6  | 0.6 |
| ec6.2.1.14 | vitamin | biotin        |  | 5.3  | 1.5 |
| ec6.3.3.3  | vitamin | biotin        |  | 2.0  | 1.2 |
| ec6.3.4.10 | vitamin | biotin        |  | 3.6  | 3.0 |
| ec6.3.4.11 | vitamin | biotin        |  | 3.6  | 3.0 |
| ec6.3.4.15 | vitamin | biotin        |  | 0.8  | 1.4 |
| ec6.3.4.9  | vitamin | biotin        |  | 3.6  | 3.0 |
| ec1.4.3.19 | vitamin | thiamine      |  | 0.7  | 2.3 |
| ec2.5.1.3  | vitamin | thiamine      |  | 0.5  | 0.8 |
| ec2.7.1.49 | vitamin | thiamine      |  | 1.6  | 1.2 |
| ec2.7.1.50 | vitamin | thiamine      |  | 6.3  | 2.3 |
| ec2.7.4.16 | vitamin | thiamine      |  | 0.3  | 1.2 |
| ec2.7.4.7  | vitamin | thiamine      |  | 1.8  | 1.2 |
| ec2.7.6.2  | vitamin | thiamine      |  | 0.7  | 0.9 |
| ec2.8.1.7  | vitamin | thiamine      |  | 0.0  | 0.9 |
| ec3.5.99.2 | vitamin | thiamine      |  | 3.6  | 2.2 |
| ec3.6.1.15 | vitamin | thiamine      |  | 0.2  | 1.2 |
| ec3.6.1.28 | vitamin | thiamine      |  | 7.0  | 3.0 |
| PF00899    | vitamin | thiamine      |  | 0.0  | 0.0 |
| PF01946    | vitamin | thiamine      |  | 10.5 | 1.1 |
| PF01964    | vitamin | thiamine      |  | 4.4  | 2.6 |
| PF02110    | vitamin | thiamine      |  | 4.9  | 3.4 |
| PF00636    | misc    | RNA silencing |  | 2.2  | 1.8 |
| PF02170    | misc    | RNA silencing |  | 4.9  | 1.1 |
| PF02171    | misc    | RNA silencing |  | 4.7  | 0.9 |
| PF03368    | misc    | RNA silencing |  | 1.0  | 1.3 |
| PF05183    | misc    | RNA silencing |  | 0.2  | 0.6 |
| PF02301    | misc    | meiosis       |  | 1.2  | 1.3 |
| PF03962    | misc    | meiosis       |  | 1.8  | 2.0 |
| PF07106    | misc    | meiosis       |  | 0.8  | 1.3 |
| SPO11      | misc    | meiosis       |  | 8.8  | 1.5 |
| PF00078    | misc    | misc          |  | 3.3  | 0.7 |
| PF00270    | misc    | misc          |  | 0.0  | 0.0 |
| PF00271    | misc    | misc          |  | 0.0  | 0.0 |
| PF00493    | misc    | misc          |  | 0.1  | 1.1 |
| PF02889    | misc    | misc          |  | 17.0 | 0.8 |
| PF08241    | misc    | misc          |  | 1.1  | 0.0 |
| PF08423    | misc    | misc          |  | 4.2  | 1.3 |
| PF13489    | misc    | misc          |  | 1.1  | 0.0 |

1: Pfam code:name or EC number from which HMM was generated; for the four HMM names that are not prefaced by PF (Pfam) or ec (constructed by us from KEGG equence alignments for that EC number) the HMM was constructed from sequence alignments obtained using PSI-BLAST, from sequences described in the text

2: Thes are subjective and in some cases fairly arbitrary categories

3: These are the Fisher exact test p-values for the distribution of HMM hits across the five major clades or the best of the branches along the Chlorophyte lineage. Coloring is from white (p-val = 1) 0 to darkest green (p-val is the lowest in that column. Colors are interpolated by Excel based on the values shown in the cells.









Supplementary Table S4: strains analyzed for DGTS by mass spectrometry

| 1kP_Sample | species                               | strain name  | media               | DUF3419 positive? | DGTS by MS? |
|------------|---------------------------------------|--------------|---------------------|-------------------|-------------|
| IRZA       | <i>Proteomonas sulcata</i>            | CCMP 704     | f/2-Si              | +                 | +           |
| NMAK       | <i>Pavlova lutheri</i>                | UTEX LB 1293 | F/2 media           | +                 | +           |
| OBUY       | <i>Porphyridium cruentum</i>          | UTEX 161     | F/2 media           | -                 | -           |
| RHVC       | <i>Dunaliella salina</i>              | SAG 42.88    | ASP-12 + soil extra | +                 | +           |
| QRTH       | <i>Chlorococcum microstigmaticum</i>  | SAG 11.43    | Waris-H             | +                 | +           |
| PRIQ       | <i>Chlorococcum oleofaciens</i>       | SAG 30.93    | Waris-H             | +                 | +           |
| ZLQE       | <i>Stephanosphaera pluvialis</i>      | SAG 78-1a    | Waris-H             | +                 | +           |
| VALZ       | <i>Chlamydomonas noctigama</i>        | SAG 36.72    | Waris-H             | +                 | +           |
| JRGZ       | <i>Chlamydomonas moewusii</i>         | SAG 1.98     | Waris-H             | +                 | +           |
| IHOI       | <i>Chloromonas oogama</i>             | SAG 9.79     | Waris-H             | +                 | +           |
| BCYF       | <i>Chlamydomonas cribrum</i>          | SAG 13.72    | Waris-H             | +                 | +           |
| IRYH       | <i>Heterochlamydomonas inaequalis</i> | SAG 4.75     | Waris-H             | +                 | +           |
| LBRP       | <i>Chloromonas reticulata</i>         | SAG 26.86    | Waris-H             | +                 | +           |
| VJDZ       | <i>Botryococcus sudeticus</i>         | UTEX 2629    | 3N-BBM-V media      | +                 | +           |
| PZIF       | <i>Scenedesmus dimorphus</i>          | UTEX 746     | 3N-BBM-V media      | +                 | +           |
| MWAN       | <i>Chlorella minutissima</i>          | UTEX 2219    | F/2 media           | +                 | +           |
| ETGN       | <i>Botryococcus braunii</i>           | UTEX 2441    | 3N-BBM-V media      | -                 | +           |
| EEJO       | <i>Neochloris oleoabundans</i>        | UTEX 1185    | 3N-BBM-V media      | -                 | -           |
| JQFK       | <i>Picochlorum atomus</i>             | UTEX LB 1998 | F/2 media           | +                 | +           |
| HVNO       | <i>Tetraselmis chui</i>               | UTEX LB 232  | F/2 media           | +                 | +           |
| PUAN       | <i>Pedinomonas tuberculata</i>        | CCAP 1965/2  | Waris-H             | +                 | +           |
| AYPS       | unidentified species                  | CCMP 1205    | ASP-12              | +                 | +           |
| TGNL       | <i>Picocystis salinarum</i>           | CCMP 1897    | ASP-12              | +                 | -           |
| HYHN       | <i>Prasinoderma coloniale</i>         | CCMP 1413    | ASP-12              | +                 | +           |
| KYIO       | <i>Mesostigma viride</i>              | NIES 476     | Waris-H             | -                 | -           |
| MXEZ       | <i>Pycnococcus provasolii</i>         | CCMP 1203    | ASP-12              | +                 | +           |
